# Supplementary material for: Stable deep-blue FAPbBr3 quantum dots facilitated by amorphous metal halide matrices
Source: Royal Society of Chemistry journal article supplement (doi:10.1039/d3cc03415a), 2023-01-01
Supplement: d3cc03415a1.pdf [file d3cc03415a1.pdf]

## Supporting Information

### Stable deep blue FAPbBr<sub>3</sub> quantum dots facilitated by amorphous metal halide matrixes

Wei Shen,<sup>‡\*</sup> Yue Qiu,<sup>‡\*</sup> Jiayu Jiang,<sup>a</sup> Zhihua Chen,<sup>a</sup> Yanxing He,<sup>a</sup> Hao Cui,<sup>a</sup> Lihui Liu,<sup>a</sup> Gang Cheng,<sup>b</sup>  
Andrey N. Aleshin,<sup>c</sup> Shufen Chen<sup>\*a</sup>

<sup>a</sup> State Key Laboratory of Organic Electronics and Information Displays & Institute of Advanced Materials (IAM), Nanjing University of Posts & Telecommunications, Nanjing 210023, People's Republic of China.

E-mail: [iamwshen@njupt.edu.cn](mailto:iamwshen@njupt.edu.cn); [iamsfchen@njupt.edu.cn](mailto:iamsfchen@njupt.edu.cn)

<sup>b</sup> State Key Laboratory of Synthetic Chemistry, HKU-CAS Joint Laboratory on New Materials, and Department of Chemistry, The University of Hong Kong, Pokfulam Road, Hong Kong (P. R. China).

<sup>c</sup> Loffe Institute, St. Petersburg 194021, Russia.

<sup>‡</sup> W. S. and Y. Q. contributed equally to this work.

## Experimental section

**Chemical Materials.** Formamidine acetate (FA-Ac, 99.9%), lead bromide ( $\text{PbBr}_2$ , 99%), n-Octylamine (OTAm, 99%), octanoic acid (OTA, 99%), nickel bromide hydrate ( $\text{NiBr}_2 \cdot x\text{H}_2\text{O}$ , 96%) and N,N-Dimethylformamide (DMF, 99.9%) were purchased from Aladdin. Toluene (99.5%) was purchased from Nanjing Chemical Reagent Co. Ltd. All materials and solvents were directly used without further purification.

**Synthesis of FAPbBr<sub>3</sub> NCs.** FAPbBr<sub>3</sub> NCs were synthesized by the following method. FA-Ac (0.12 mmol),  $\text{PbBr}_2$  (0.3 mmol), OTA (3.6 mmol) and OTAm (0.18 mmol) were dissolved in 5 mL of DMF to prepare precursor solution. Then, 80  $\mu\text{L}$  of the precursor solution was injected into 4 mL of toluene under vigorous stirring at room temperature. After the FAPbBr<sub>3</sub> crude solution was centrifuged at 5000 rpm for 3 min, we discarded the bottom sediment. 2 mL toluene was added into the supernatant, then the mixture was centrifuged 5 min at 12000 rpm. After discarding the supernatant, the precipitate was FAPbBr<sub>3</sub> NCs, which were redispersed into 2 mL toluene for further characterization.

**Synthesis of FAPbBr<sub>3</sub> QDs based on metal halide matrix.** FAPbBr<sub>3</sub> QDs were synthesized by the following method. In a typical ligand-assisted reprecipitation method, FA-Ac (0.12 mmol), OTA (3.6 mmol), OTAm (0.18 mmol) and different ratios of  $\text{PbBr}_2/\text{NiBr}_2 \cdot x\text{H}_2\text{O}$  (Ni/Pb = 0, 0.5, 0.7, 1, 1.5, 2 and 2.75) were dissolved in 5 mL of DMF to prepare precursor solution. Then, 80  $\mu\text{L}$  of the precursor solution was injected into 4 mL of toluene under vigorous stirring at room temperature. Centrifugal purification steps were the same as the steps of FAPbBr<sub>3</sub> NCs.

**Characterization.** The ultraviolet-visible (UV-vis) absorption spectra of QDs solutions were recorded using a PerkinElmer Lambda 35S instrument in transmission mode. PL spectra were recorded using a RF6000 spectrofluorometer with an excitation wavelength of 365 nm. The morphology and size of QDs were confirmed by transmission electron microscopy (TEM) (Hitachi, HT7700) and high-resolution TEM (HRTEM) (Talos, F200X). The chemical compositions were determined using a PerkinElmer NexION 2000 inductively coupled plasma mass spectrometer (ICP-MS).

X-ray diffraction (XRD) data were collected using a Bruker D8 Advance X-ray powder diffractometer with Cu K $\alpha$  radiation ( $\lambda = 0.154$  nm). The PL lifetimes of QDs were measured using an FLS920 fluorescence spectrometer with a pulse laser at 375 nm. The photoluminescence fluorescence quantum yield (PLQY), which is defined as the ratio of emitted photons to absorbed ones, was determined using a FLS920 fluorescence spectrometer equipped with an integrating sphere.

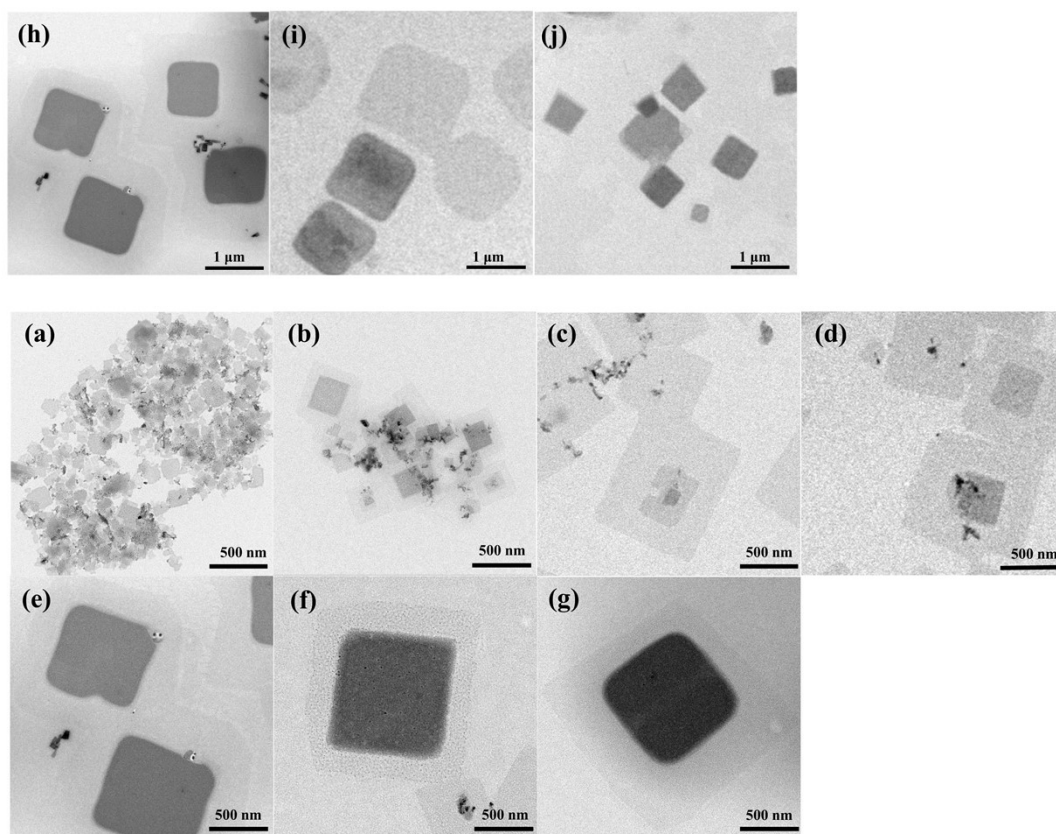

**Figure S1.** TEM images of FAPbBr<sub>3</sub> NCs and Ni<sup>2+</sup>-doped FAPbBr<sub>3</sub> QDs: (a) Ni/Pb=0, (b) Ni/Pb=0.44%, (c) Ni/Pb=0.60%, (d) Ni/Pb=0.80%, (e) Ni/Pb=1.36%, (f) Ni/Pb=4.86%, (g) Ni/Pb=7.96%. TEM images with larger scanning areas: (h) Ni/Pb=1.36%, (i) Ni/Pb=4.86%, (j) Ni/Pb=7.96%.

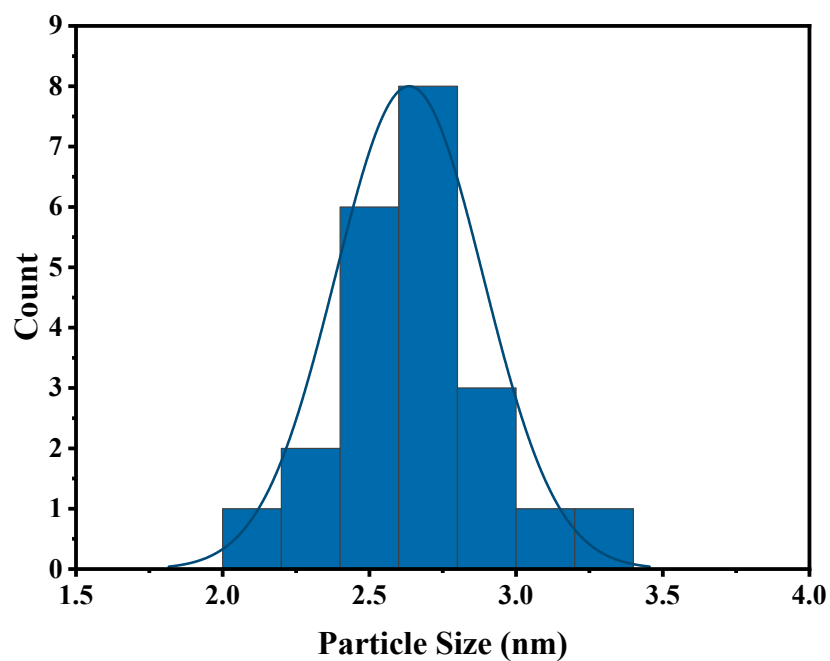

**Figure S2.** Particle size of deep blue FAPbBr<sub>3</sub> QDs. (Ni/Pb = 4.86%)

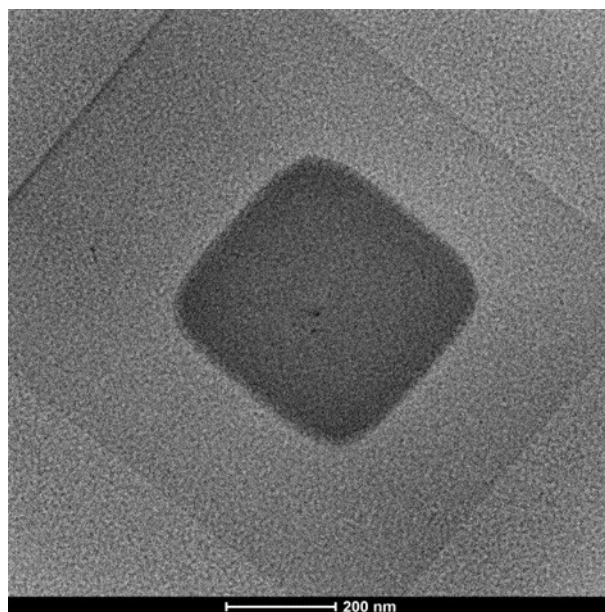

**Figure S3.** TEM images of deep blue FAPbBr<sub>3</sub> QDs (Ni/Pb=4.86%).

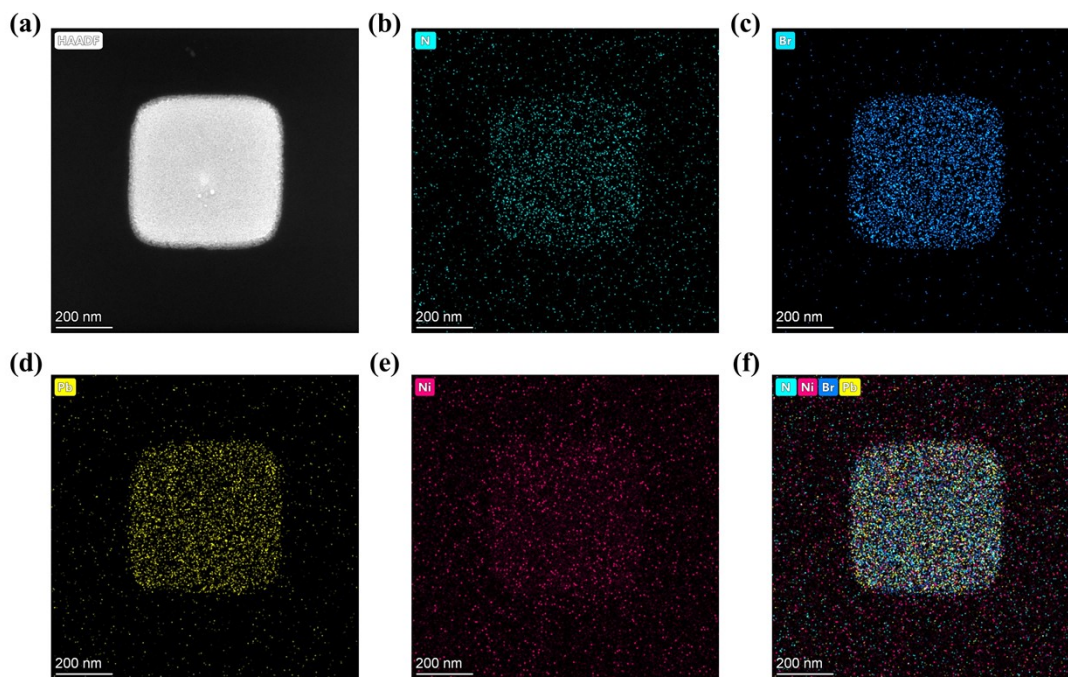

**Figure S4.** HAADF-STEM images of Figure S3 and the corresponding elemental mapping of N, Pb, Br, and Ni.

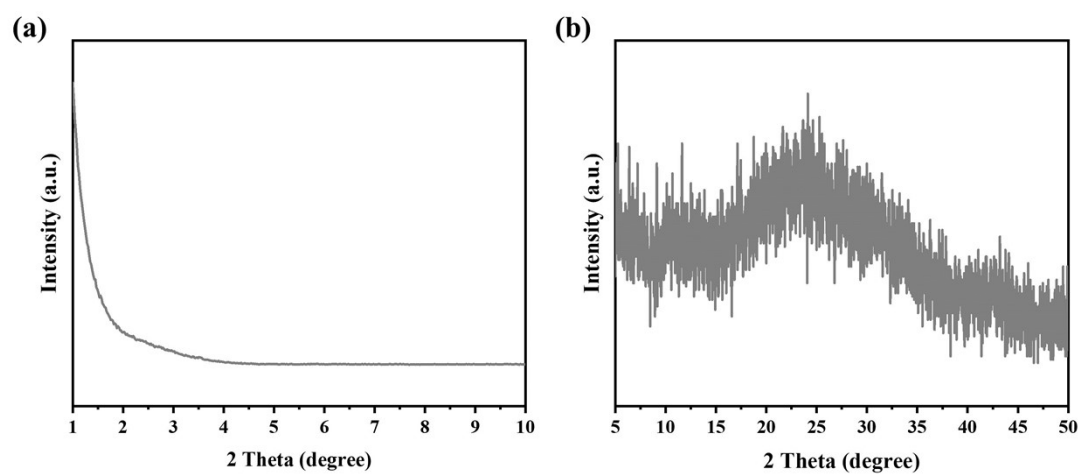

**Figure S5.** XRD patterns  $\text{Ni}^{2+}$  based metal halide matrix. (a) XRD patterns from 1-10°, (b) from 5-50°.

**Table S1.** The actual ratios of the Ni/Pb by ICP-MS for different Ni/Pb feed ratios

| <b>Samples</b> | <b>Ni (ppb)</b> | <b>Pb (ppb)</b> | <b>Actual Ni/Pb ratio</b> |
|----------------|-----------------|-----------------|---------------------------|
| B              | 0.282           | 64.091          | 0.44%                     |
| C              | 0.411           | 68.500          | 0.60%                     |
| D              | 0.539           | 67.375          | 0.80%                     |
| E              | 0.729           | 53.603          | 1.36%                     |
| F              | 1.906           | 39.218          | 4.86%                     |
| G              | 4.802           | 60.327          | 7.96%                     |

**Table S2.** PL lifetime of blue light component for Ni/Pb=4.86% and Ni/Pb=7.96%

| <b>Samples</b>    | <b>Ni/Pb=4.86%</b> | <b>Ni/Pb=7.96%</b> |
|-------------------|--------------------|--------------------|
| $\tau_1$ (ns)     | 0.70               | 0.74               |
| $\tau_2$ (ns)     | 5.98               | 6.32               |
| $\tau_3$ (ns)     | 65.19              | 56.04              |
| A1                | 0.97 (60.6%)       | 0.98 (86.8%)       |
| A2                | 0.10 (6.3%)        | 0.10 (8.8%)        |
| A3                | 0.53 (33.1%)       | 0.05 (4.4%)        |
| $\tau_{avg}$ (ns) | 62.98              | 38.82              |
